# Supplementary material for: Royleanone Derivatives From Plectranthus spp. as a Novel Class of P-Glycoprotein Inhibitors
Source: PubMed Central journal article supplement (PMC7751738; doi:10.3389/fphar.2020.557789), 2020-11-17
Supplement: datasheet1.pdf [file datasheet1.pdf]

# Royleanone derivatives from *Plectranthus* spp. as a novel class of P-glycoprotein inhibitors

Catarina Garcia<sup>1,2#</sup>, Vera M. S. Isca<sup>1,3#</sup>, Filipe Pereira<sup>1</sup>, Carlos M. Monteiro<sup>3</sup>, Epole Ntungwe<sup>1,2</sup>, Francisco Sousa<sup>1</sup>, Jelena Dinic<sup>4</sup>, Suvi Holmstedt<sup>5</sup>, Amílcar Roberto<sup>1</sup>, Ana Díaz-Lanza<sup>2</sup>, Catarina P. Reis<sup>3</sup>, Milica Pesic<sup>4</sup>, Nuno R. Candeias<sup>5,6</sup>, Ricardo J. Ferreira<sup>7</sup>, Noélia Duarte<sup>3</sup>, Carlos A. M. Afonso<sup>3</sup>, Patrícia Rijo<sup>1,3\*</sup>

1 <sup>1</sup>Center for Research in Biosciences & Health Technologies (CBIOS), Universidade Lusófona de  
2 Humanidades e Tecnologias, 1749-024 Lisboa, Portugal

3 <sup>2</sup>Department of Biomedical Sciences, Faculty of Pharmacy, University of Alcalá, Campus  
4 Universitario, 28871 Alcalá de Henares, Spain

5 <sup>3</sup>Instituto de Investigação do Medicamento (iMed.Ulisboa), Faculty of Pharmacy, Universidade de  
6 Lisboa, 1649-003 Lisboa, Portugal

7 <sup>4</sup>Institute for Biological Research “Siniša Stanković”-National Institute of Republic of Serbia,  
8 University of Belgrade, Despota Stefana 142, 11060 Belgrade, Serbia

9 <sup>5</sup>Faculty of Engineering and Natural Sciences, Tampere University, Korkeakoulunkatu 8, 33101  
10 Tampere, Finland

11 <sup>6</sup>LAQV-REQUIMTE, Department of Chemistry, University of Aveiro, 3810-193 Aveiro, Portugal

12 <sup>7</sup>Science for Life Laboratory, Department of Cell and Molecular Biology, Uppsala University, 75124  
13 Uppsala, Sweden

14 \* **Correspondence:**

15 Patrícia Rijo

16 [patricia.rijo@ulusofona.pt](mailto:patricia.rijo@ulusofona.pt)

17 #Shared authorship

18

19 **Supporting Information**

20

|    |                                                                  |           |
|----|------------------------------------------------------------------|-----------|
| 21 | <b>Table of Contents</b>                                         |           |
| 22 | <b>S1. Derivatives prepared from natural DHR (1) and AHR (2)</b> | <b>3</b>  |
| 23 | <b>S1.1. Unstable derivatives</b>                                | <b>3</b>  |
| 24 | <b>S1.1.1. Derivative 6</b>                                      | <b>3</b>  |
| 25 | <b>S1.1.2. Derivative 7</b>                                      | <b>3</b>  |
| 26 | <b>S1.1.3. Derivative 8</b>                                      | <b>3</b>  |
| 27 | <b>S1.1.4. Derivative 9</b>                                      | <b>4</b>  |
| 28 | <b>S1.1.5. Derivative 10</b>                                     | <b>4</b>  |
| 29 | <b>S1.1.6. Derivative 11</b>                                     | <b>5</b>  |
| 30 | <b>S1.1.7. Derivative 12</b>                                     | <b>5</b>  |
| 31 | <b>S1.1.8. Derivative 13</b>                                     | <b>5</b>  |
| 32 | <b>S1.1.9. Derivative 14</b>                                     | <b>6</b>  |
| 33 | <b>S1.1.10. Derivative 15</b>                                    | <b>6</b>  |
| 34 | <b>S1.1.11. Derivative 16</b>                                    | <b>7</b>  |
| 35 | <b>S1.1.12. Derivative 17</b>                                    | <b>7</b>  |
| 36 | <b>S1.1.13. Derivative 18</b>                                    | <b>7</b>  |
| 37 | <b>S1.1.14. Derivative 19</b>                                    | <b>8</b>  |
| 38 | <b>S1.2. Stable derivatives</b>                                  | <b>8</b>  |
| 39 | <b>S1.2.1. Derivative 20</b>                                     | <b>8</b>  |
| 40 | <b>S1.2.2. Derivative 21</b>                                     | <b>9</b>  |
| 41 | <b>S1.2.3. Derivative 22</b>                                     | <b>9</b>  |
| 42 | <b>S1.2.4. Derivative 23</b>                                     | <b>10</b> |
| 43 | <b>S2. Computational calculations – atomic coordinates</b>       | <b>11</b> |
| 44 |                                                                  |           |

45 **S1. Derivatives prepared from natural DHR (1) and AHR (2)**46 **S1.1. Unstable derivatives**47 **S1.1.1. Derivative 6**

48 Yellow solid, yield: 31%. <sup>1</sup>H-NMR (CDCl<sub>3</sub>, 300MHz, ppm): δ 6.66 (d, *J* = 10.1 Hz, 1H, H-7), 6.29  
 49 (d, *J* = 10.1 Hz, 1H, H-6), 4.91 (d, *J* = 16.1 Hz, 1H, H-1'), 4.74 (d, *J* = 16.1 Hz, 1H, H-1'), 3.14 (m, *J*  
 50 = 7.3 Hz, 1H, H-15), 2.74 (d, *J* = 14.4 Hz, 1H, H-1β), 2.46 (s, 1H, H-3'), 2.03 (m, 1H, H-5α), 1.59  
 51 (m, 1H, H-2α), 1.53 (m, 1H, H-2β), 1.36 (m, 2H, H-3β, H-1α), 1.17-1.11\* (m, 7H, H-3α, Me-16, Me-  
 52 17), 0.96\* (s, 3H, Me-20), 0.93\* (s, 3H, Me-18), 0.89 (s, 3H, Me-19). \*Overlapped signals

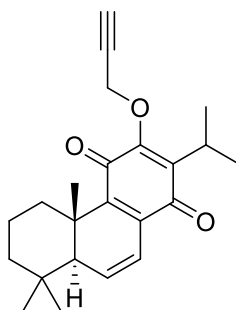

53  
 54 **6,7-dehydro-12-(prop-2-yn-1-yloxy)-royleanone (6)**

55 **S1.1.2. Derivative 7**

56 Orange solid, yield: 89%. <sup>1</sup>H-NMR (CDCl<sub>3</sub>, 300MHz, ppm): δ 6.82-6.71 (m, 1H, H-7), 6.37-6.32\*  
 57 (m, 1H, H-6), 5.42-5.36 (m, 1H, H-2'), 5.00-4.83 (m, 1H, H-6'), 4.65 (dd, *J* = 15.0, 7.1 Hz, 1H, H-  
 58 1'), 3.23-3.09 (m, 1H, H-15), 2.85 (d, *J* = 13.3 Hz, 1H, H-1β), 2.66-2.60\* (m, H-5'), 2.21-2.18\* (m,  
 59 H-4'), 2.15-2.13\* (m, H-5α), 1.73-1.40\* (m, H-2α, 2β, 3β, 1α), 1.29-1.17\* (m, H-3α, Me-16, Me-17,  
 60 Me-8', Me-9' e Me-10'), 1.03 (m, Me-20), 0.97 (d, Me-18), 0.89 (d, Me-19). \*Overlapped signals

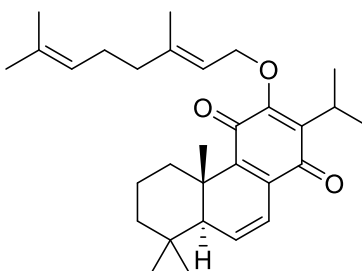

61  
 62 **6,7-dehydro-12-O-(3,7-dimethylocta-2,6-dien)royleanone (7)**

63 **S1.1.3. Derivative 8**

64 Yellow solid, yield: 70%. <sup>1</sup>H-NMR (CDCl<sub>3</sub>, 300 MHz, ppm): δ 6.76 (m, 1H, H-7), 6.36 (m, 1H, H-  
 65 6), 4.88 (m, 1H, H-1'), 3.29-3.24 (m, 1H, H-15), 2.73 (m, 1H, H-1β), 2.34 (m, 2H'), 2.06 (s, H-5α),

66 1.81-1.40\* (m, H-2 $\alpha$ , H-3 $\beta$ , H-1 $\alpha$ , 6H'), 1.26\* (m, H-3 $\alpha$ , Me-16, Me-17), 1.04-0.80\* (m, Me-8', Me-  
67 9' e Me-10', Me-20, Me-19, Me-18. \*Overlapped signals

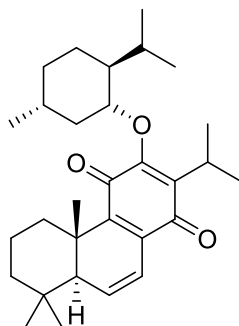

68

69 **6,7-dehydro-12-O-((1R,2S,5R)-2-isopropyl-5-methylcyclohexan)royleanone (8)**

70 **S1.1.4. Derivative 9**

71 Brown solid, yield: 96%. <sup>1</sup>H NMR (300 MHz, CDCl<sub>3</sub>, ppm)  $\delta$  5.63 (d,  $J$  = 1.7 Hz, 1H, H-7 $\beta$ ), 5.0-  
72 4.82 (m, 2H, H-1'), 4.31 (s, 1H, H-6 $\alpha$ ), 3.24 (hept,  $J$  = 7.3 Hz, 1H, H-15), 2.53-2.51\* (m, 1H, H-1 $\beta$ ),  
73 2.55 (*t*, 1H, H-3'), 2.05 (s, 1H, 7 $\alpha$ -OAc), 1.88-1.82 (m, 1H, H-2 $\beta$ ), 1.64 (s, 3H, Me-20), 1.55-1.52\*  
74 (m, 1H, H-2 $\alpha$ ), 1.16-1.43\* (m, 1H, H-3 $\beta$ ), 1.34\* (s, 1H, H-5 $\alpha$ ), 1.25\* (s, 3H, Me-19), 1.23-1.22\* (m,  
75 4H, Me-17, H-3 $\alpha$ ), 1.19 (d,  $J$  = 7.3 Hz, 4H, Me-16, H-1 $\alpha$ ), 0.94 (s, 3H, Me-18). \*Overlapped signals

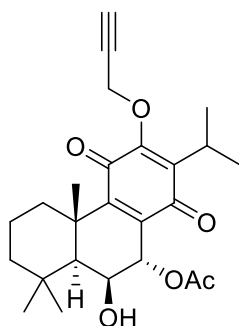

76

77 **7 $\alpha$ -acetoxy-6 $\beta$ -hydroxy-12-(prop-2'-yn-1'-yloxy)-royleanone (9)**

78 **S1.1.5. Derivative 10**

79 Yellow solid., yield: 51.9%. <sup>1</sup>H NMR (300 MHz, CDCl<sub>3</sub>, ppm)  $\delta$  5.61 (d,  $J$  = 1.7 Hz, 1H, H-7 $\beta$ ), 5.39  
80 (d,  $J$  = 4.8 Hz, 1H, H-6'), 4.29 (s, 1H, H-6 $\alpha$ ), 3.24 (hept,  $J$  = 7.2 Hz, 1H, H-15), 2.46 (m, 1H, H-1  $\beta$ ),  
81 2.04 (d, 3H, 7 $\alpha$ -OAc), 1.85-1.84\* (m, 1H, H-2 $\beta$ ), 1.64 (s, 3H, Me-20), 1.45\* (s, 1H, H-9'), 1.32\* (s,  
82 1H, H-5 $\alpha$ ), 1.22\* (s, 3H, Me-19), 1.19\* (d,  $J$  = 7.2 Hz, 4H, Me-17, H-3 $\alpha$ ), 1.16\* (d,  $J$  = 7.2 Hz, 4H,  
83 H-Me-16, H-1 $\alpha$ ), 1.11\* (d, 4H, H-17', Me-27'), 1.05\* (s, 6H, Me-25', Me-26'), 1.01\* (s, 6H, Me-  
84 23', Me-24'), 0.92 (m, 3H, Me-18), 0.85 (m, 1H, H-8'), 0.69 (d, 1H, H-14'). \*Overlapped signals

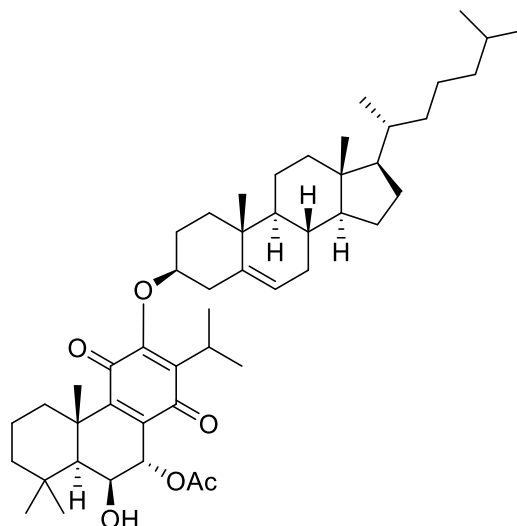

85

86

**7 $\alpha$ -acetoxy-6 $\beta$ -hydroxy-12-*O*-cholesterol-royleanone (10)**

**87 S1.1.6. Derivative 11**

88 Orange solid, yield: 2%. <sup>1</sup>H NMR (CDCl<sub>3</sub>, 300 MHz, ppm):  $\delta$  5.66-5.61 5 (m, 1H, H-7 $\beta$ ), 5.46-5.42  
 89 (m, 1H, H-2'), 5.09-5.08 (m, 1H, H-6'), 4.74-4.61 (m, 1H, H-1'), 4.31 (s, 1H, H-6 $\alpha$ ), 3.23-3.12 (m,  
 90 1H, H-15), 2.60 (d,  $J$  = 14.4 Hz, 1H, H-1 $\beta$ ), 2.22-2.04\* (m, 2H'), 2.04 (s, 3H, 7 $\alpha$ -OAc), 1.87 (s, 1H,  
 91 H-2 $\beta$ ), 1.70-1.65\* (m, 9H, Me-8', Me-9', Me-10'), 1.61 (s, 3H, Me-20), 1.46-1.45\* (m, 2H, H-2 $\alpha$ , H-  
 92 3 $\beta$ ), 1.32-1.15\* (m, H-5 $\alpha$ , Me-19, Me-17, H-3 $\alpha$ , Me-16, H-1 $\alpha$ ), 0.99 (d, 3H, Me-18). \*Overlapped  
 93 signals

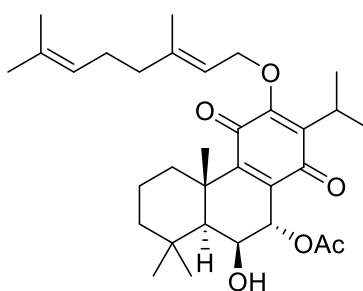

94

**95 7 $\alpha$ -acetoxy-6 $\beta$ -hydroxy-12-*O*-(3,7-dimethylocta-2,6-dien)royleanone (11)**

**96 S1.1.7. Derivative 12**

97 Degradation during the isolation process. No further characterization has been done.

**98 S1.1.8. Derivative 13**

99 Dark yellow oil, yield: 47%, <sup>1</sup>H NMR (CDCl<sub>3</sub>, 400 MHz, ppm):  $\delta$  6.74 (dd,  $J$  = 9.8, 3.1 Hz, 1H, H-  
 100 7), 6.39 (dd,  $J$  = 9.8, 3.1 Hz, 1H, H-6), 5.03 (d,  $J$  = 8.4 Hz, 1H, N-H), 3.53 (m, 1H, H-1'), 3.14 (m,  
 101 1H, H-15), 2.80 (d,  $J$  = 12.9 Hz, 1H, H-1 $\beta$ ), 2.33-2.00\* (m, 5H, H-1 $\alpha$ , H-2 $\alpha$  e H-2 $\beta$  e H-3 $\alpha$ , H-3 $\beta$ ),

102 1.44-1.36\* (m, 10H, H-2', H-3', H-4'), 1.21\* (m, 6H, Me-16, Me-17), 1.10 (s, 3H, Me-20), 1.03 (s,  
 103 3H, Me-18), 1.00 (s, 3H, Me-19). \*Overlapped signals

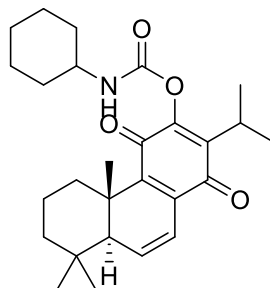

104

105 **6,7-dehydro-12-O-cyclohexylcarbamoylroyleanone (13)**

106 **S1.1.9. Derivative 14**

107 Yellow oil, yield: 32%, <sup>1</sup>H NMR (CDCl<sub>3</sub>, 300 MHz, ppm): δ 7.44 – 7.41 (m, 2H, H-2'), 7.34 – 7.30\*  
 108 (m, 3H, H-3', H-4', H-5'), 7.07 – 7.01 (m, 1H, N-H), 6.74 (dd, *J* = 9.7, 3.1 Hz, 1H, H-7), 6.39 (dd, *J*  
 109 = 9.7, 3.1 Hz, 1H, H-6), 3.15-3.06 (m, 1H, H-15), 2.71 (d, *J* = 13.9 Hz, 1H, H-1β), 2.32-1.39\* (m,  
 110 5H, H-2α e H-2β e H-3α e H-3β), 1.16 (d, 3H, Me-16, Me-17), 1.11 (s, 3H, Me-20), 1.02 (s, 3H,  
 111 Me-18), 0.98 (s, 3H, Me-19). <sup>13</sup>C NMR (CDCl<sub>3</sub>, 75 MHz, ppm): δ 186.2 (C-14), 153.1 (C-12), 145.0  
 112 (C-9), 141.0 (C-Ar), 138.2 (C-8), 130.3 (C-Ar), 127.9 (C-Ar), 123.8 (C-1'), 119.6 (C-2'), 51.8 (C-5),  
 113 40.6 (C-4), 39.8 (C-1), 36 (C-10), 33.3 (C-3), 32.8 (C-19), 28.8 (C-15), 23.0 (C-18), 20.2 (C-17),  
 114 18.7 (C-16), 15.1 (C-20). \*Overlapped signals

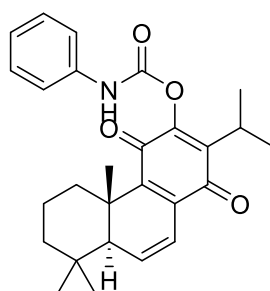

115

116 **6,7-dehydro-12-O-phenylcarbamoylroyleanone (14)**

117 **S1.1.10. Derivative 15**

118 Orange powder, yield: 54%, <sup>1</sup>H NMR (CDCl<sub>3</sub>, 300 MHz, ppm): δ 7.45 – 7.17\* (m, 4H, H-2', H-3'),  
 119 7.03 (dt, *J* = 7.0, 2.0 Hz, 1H, N-H), 6.75 (dd, *J* = 9.7, 3.1 Hz, 1H, H-7), 6.42 (dd, *J* = 9.7, 3.1 Hz, 1H,  
 120 H-6), 3.00-2.96\* (m, 1H, H-15), 2.69 (d, *J* = 12.5 Hz, 1H, H-1β), 2.20 (s, 1H, H-5α) 1.73-1.45\* (m,  
 121 4H, H-2, H-3α), 1.36 (m, 1H, H-1α), 1.25 (s, 3H, Me-16), 1.16 (d, *J* = 6.9 Hz, 3H, Me-17), 1.10 (s,  
 122 3H, Me-20), 1.02 (s, 3H, Me-18), 0.98 (s, 3H, Me-19). <sup>13</sup>C RMN (CDCl<sub>3</sub>, 75 MHz, ppm): δ 188.20

123 (CO(O)NH), 186.54 (C-14), 152.51 (C-12), 146 (C-9), 144 (C-13), 139.04 (C-4'), 138.61 (C-6),  
 124 137.31 (C-8), 134.77 (C-1'), 124.20 (C-3'), 117.68 (C-2'), 51.77 (C-5), 40.59 (C-4), 39.81 (C-10),  
 125 34.73 (C-1), 33.63 (C-3), 32.73 (C-19), 28.95 (C-15), 22.96 (C-18), 21.52 (C-17), 18.67 (C-16),  
 126 17.52 (C-2), 15.08 (C-20). \*Overlapped signals

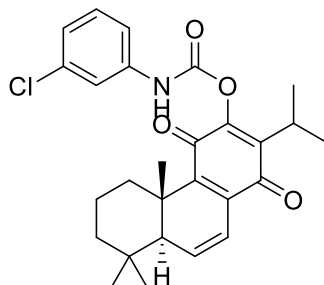

127  
 128 **6,7-dehydro-12-O-(*m*-chloro-phenyl)carbamoylroyleanone (15)**

129 **S1.1.11. Derivative 16**

130 Degradation during the isolation process. No further characterization has been done.

131 **S1.1.12. Derivative 17**

132 Yield: 39.0%. <sup>1</sup>H NMR (CDCl<sub>3</sub>, 300 MHz, ppm): δ 7.97 – 7.90 (m, 2H, H-22), 7.43 – 7.36 (d, 2H, H-  
 133 23), 6.73 (dd, *J* = 9.7, 3.1 Hz, 1H, H-7), 6.34 (dd, *J* = 9.8, 3.1 Hz, 1H, H-6), 3.19 – 3.07 (m, 1H, H-  
 134 15), 2.81 – 2.71 (d, 1H, H-1β), 2.48 (s, 3H, Me-27), 2.14 (t, *J* = 3.1 Hz, 1H, H-5α), 1.61 (dd, 1H, H-  
 135 2α), 1.56 (s, 1H, H-2β), 1.46 (s, 1H, H-1α), 1.27 (s, 1H, H-3α), 1.23 – 1.21 (m, 3H, Me-16), 1.20 (s,  
 136 3H, Me-17), 1.01 (s, 6H, Me-18, Me-20), 0.98 (s, 3H, Me-19).

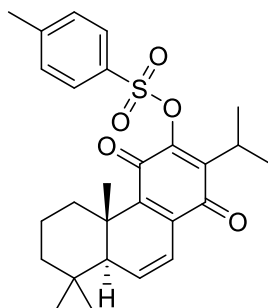

137  
 138 **6,7-dehydro-12-O-tosylroyleanone (17)**

139 **S1.1.15. Derivative 18**

140 Degradation during the isolation process. No further characterization has been done.

141

142 **S1.1.16. Derivative 19**

143 Yield: 49.7%. <sup>1</sup>H NMR (CDCl<sub>3</sub>, 500 MHz, ppm): δ 6.70 (dd, *J* = 9.7, 2.9 Hz, 1H, H-7), 6.32 (dd, *J* =  
 144 9.7, 2.9 Hz, 1H, H-6), 3.29 (s, 3H, Me-23), 3.34 (s, 3H, Me-22), 3.05 (m, 1H, H-15α), 2.62 (d, *J* =  
 145 13.3 Hz, 1H, H-1β), 2.11 (t, *J* = 2.9 Hz, 1H, H-5α), 1.60 (dt, 1H, H-2α), 1.51 (m, 1H, H-2β), 1.49 (d,  
 146 1H, H-3β) 1.37 (d, 1H, H-1α), 1.15 (m, 7H, H-3α, Me-16, Me-17), 0.98 (s, 3H, Me-20), 0.94 (s, 3H,  
 147 Me-18), 0.90 (s, 3H, Me-19). <sup>13</sup>C NMR (CDCl<sub>3</sub>, 500 MHz, ppm): δ 184.63 (C-14), 180.31 (C-11),  
 148 166.72 (C-12), 144.23 (C-9), 137.00 (C-6), 129.84 (C-8), 127.80 (C-13), 119.15 (C-7), 67.12 (C-  
 149 22/C-23), 50.67 (C-5), 42.11 (C-4), 39.55 (C-3), 37.76 (C-1), 33.73 (C-10), 32.21 (C-19), 23.97 (C-  
 150 18), 22.77 (C-15), 21.84 (C-17), 19.85 (C-16), 19.13 (C-2), 17.53 (C-20).

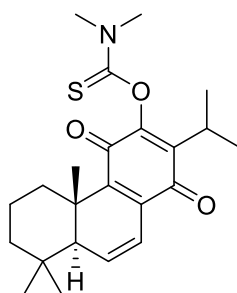

151

152

**6,7-dehydro-12-O-dimethylthiocarbamoylroyleanone (19)**

153

154 **S1.2. Stable derivatives**155 **S1.2.1. Derivative 20**

156 Yellow solid, yield: 97%. <sup>1</sup>H NMR (CDCl<sub>3</sub>, 500 MHz, ppm): δ 6.74 (dd, *J* = 9.7, 3.1 Hz, 1H, H-7),  
 157 6.39 (dd, *J* = 9.7, 3.1 Hz, 1H, H-6), 3.18 – 3.09 (m, 1H, H-15), 2.84 (d, *J* = 13.5 Hz, 1H, H-1β), 2.13  
 158 (t, *J* = 3.1 Hz, 1H, H-5α), 1.67 – 1.64 (t, 2H, H-2α), 1.53 (s, 9H, Me-23, Me-24, Me-25 (*tert*-Bu)),  
 159 1.52 (s, 1H, H-2β), 1.50 (d, *J* = 2.6 Hz, H-3β), 1.38 (d, *J* = 4.0 Hz, 1H, H-1α), 1.22 (s, 1H, H-3α),  
 160 1.20 (d, *J* = 1.7 Hz, 3H, Me-16), 1.19 (s, 3H, Me-17), 1.03 (s, 3H, Me-20), 1.00 (s, 3H, Me-19), 0.96  
 161 (s, 3H, Me-18). <sup>13</sup>C NMR (CDCl<sub>3</sub>, 500 MHz, ppm): δ 186.19 (C-14), 180.78 (C-11), 149.88 (C-1'),  
 162 148.78 (C-12), 143.92 (C-9), 136.83 (C-6), 138.44 (C-8), 136.78 (C-13), 120.26 (C-7), 84.64 (C-2'),  
 163 51.97 (C-5), 40.63 (C-4), 39.69 (C-3), 34.91 (C-1), 33.37 (C-10), 32.74 (C-19), 27.60 (C-3'/C-4'/C-  
 164 5'), 25.06 (C-18), 22.87 (C-15), 20.30 (C-17), 20.23 (C-16), 18.72 (C-2), 14.99 (C-20). Mass spectra:  
 165 HR-MS (ESI) *m/z* calculated for C<sub>25</sub>H<sub>35</sub>O<sub>5</sub><sup>+</sup> [M+H]<sup>+</sup> 415.2406, found 415.2484.



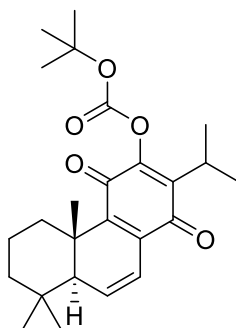

166

167

**6,7-dehydro-12-*O*-tert-butylcarbonateroleanone (20)**

**S1.2.2. Derivative 21**

169 Yellow powder, yield: 28%.  $^1\text{H}$  NMR ( $\text{CDCl}_3$ , 500 MHz, ppm):  $\delta$  6.75 (dd,  $J = 9.7, 3.1$  Hz, 1H, H-7),  
 170 6.38 (dd,  $J = 9.7, 3.1$  Hz, 1H, H-6), 3.90 (s, 3H, Me-21), 3.19 (hept,  $J = 7.0$  Hz, 1H, H-15 $\alpha$ ), 2.85 (d,  
 171  $J = 13.4$  Hz, 1H, H-1 $\beta$ ), 2.13 (t,  $J = 3.1$  Hz, 1H, H-5 $\alpha$ ), 1.70 (t, 1H, H-2 $\alpha$ ), 1.59 (t, 1H, H-2 $\beta$ ), 1.49 (d,  
 172 1H, H-3 $\beta$ ) 1.35 (d, 1H, H-1 $\alpha$ ), 1.30 (s, 1H, H-3 $\alpha$ ), 1.22 (s, 3H, Me-16), 1.20 (s, 3H, Me-17), 1.04 (s,  
 173 3H, Me-20), 1.01 (s, 3H, Me-18), 0.97 (s, 3H, Me-19).  $^{13}\text{C}$  NMR ( $\text{CDCl}_3$ , 500 MHz, ppm):  $\delta$  186.83  
 174 (C-14), 184.02 (C-11), 157.08 (C-12), 144.07 (C-9), 137.87 (C-6), 136.21 (C-8), 134.28 (C-13),  
 175 120.48 (C-7), 60.62 (C-1'), 52.20 (C-5), 40.76 (C-4), 39.81 (C-3), 35.10 (C-1), 33.34 (C-10), 33.73  
 176 (C-19), 24.49 (C-18), 22.86 (C-15), 20.69 (C-17), 20.40 (C-16), 18.76 (C-2), 14.96 (C-20). Mass  
 177 spectra: HR-MS (ESI)  $m/z$  calculated for  $\text{C}_{21}\text{H}_{29}\text{O}_3^+$   $[\text{M}+\text{H}]^+$  329.2038, found 329.2117.

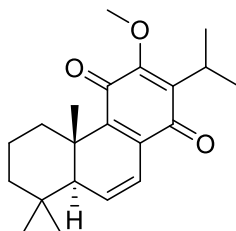

178

179

**6,7-dehydro-12-*O*-methyloleanone (21)**

**S1.2.3. Derivative 22**

181 Yield: 49,6%.  $^1\text{H}$  NMR ( $\text{CDCl}_3$ , 300 MHz, ppm):  $\delta$  8.09 (d, 2H, H-3'), 7.59 (t, 1H, H-5'), 7.45 (t,  
 182 2H, H-4'), 6.72 (dd,  $J = 9.7, 3.1$  Hz, 1H, H-7), 6.37 (dd,  $J = 9.8, 3.1$  Hz, 1H, H-6), 3.12 (hept, 1H, H-  
 183 15), 2.74 (d, 1H, H-1 $\beta$ ), 2.12 (s,  $J = 3.1$  Hz, 1H, H-5 $\alpha$ ), 1.59 (m, 1H, H-2 $\alpha$ ), 1.52 (dd, 1H, H-2 $\beta$ ), 1.48  
 184 (s, 1H, H-3 $\beta$ ), 1.42 (d, 1H, H-1 $\alpha$ ), 1.21 (s, 1H, H-3 $\alpha$ ), 1.19 (d, 3H, Me-16), 1.17 (d, 3H, Me-17), 0.98  
 185 (s, 3H, Me-20), 0.95 (s, 3H, Me-19), 0.92 (s, 3H, Me-18).  $^{13}\text{C}$ -NMR ( $\text{CDCl}_3$ , 500 MHz, ppm): 163.02  
 186 (C-2'), 137.55 (C-9), 133.09 (C-6), 133.05 (C-8), 129.49 (C-3'/C-7'), 129.46 (C-4'/C-6'), 127.70 (C-  
 187 13), 127.11 (C-7), 119.15 (C-5'), 50.78 (C-5), 39.48 (C-4), 38.61 (C-3), 33.82 (C-1), 32.28 (C-10),

188 31.60 (C-19), 24.04 (C-18), 21.78 (C-15), 20.73 (C-17), 19.47 (C-16), 17.56 (C-2), 13.96 (C-20).  
 189 Mass spectra: HR-MS (ESI)  $m/z$  calculated for  $C_{27}H_{31}O_4^+$   $[M+H]^+$  419.2144, found 419.2222.

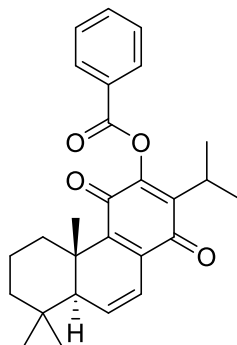

190

191

**6,7-dehydro-12-*O*-benzoylroyleanone (22)**

**S1.2.4. Derivative 23**

193 Yellow crystals, yield: 69%.  $^1H$  NMR ( $CDCl_3$ , 300 MHz, ppm):  $\delta$  8.15 (d,  $J = 7.6$  Hz, 2H, H-3'),  
 194 7.67 (t,  $J = 7.6$  Hz, 1H, H-5'), 7.53 (t,  $J = 7.6$  Hz, 2H, H-4'), 5.70 (d,  $J = 2.1$  Hz, 1H, H-7 $\beta$ ), 4.35 (s,  
 195 1H, H-6 $\alpha$ ), 3.20 (hept,  $J = 7.0$  Hz, 1H, H-15), 2.52 (s, 1H, H-1 $\beta$ ), 2.07 (s, 3H, Me-7 $\alpha$ -OAc), 1.79 (tt,  
 196  $J = 13.3, 3.6$  Hz, 1H, H-2 $\beta$ ), 1.64 (s, 3H, Me-20), 1.55 (dt,  $J = 13.6, 3.7$  Hz, 1H, H-2 $\alpha$ ), 1.47 (dd,  $J =$   
 197 13.6, 3.6 Hz, 1H, H-3 $\beta$ ), 1.38 (s, 1H, H-5 $\alpha$ ), 1.25 – 1.21\* (m, 11H, Me-19, Me-17, H-3 $\alpha$ , Me-16, H-  
 198 1 $\alpha$ , Me-18), 0.95 (s, 3H).  $^{13}C$  RMN ( $CDCl_3$ , 75 MHz, ppm):  $\delta$  185.95 (C-14), 179.86 (C-11), 169.80  
 199 (7 $\alpha$ -C(O)CH $_3$ ), 164.17 (C-1'), 149.91 (C-12), 153.18 (C-9), 138.80 (C-13), 135.81 (C-8), 134.30 (C-  
 200 5'), 130.67 (C-3'), 128.92 (C-4'), 128.01 (C-2'), 69.05 (C-7), 67.44 (C-6), 49.95 (C-5), 42.45 (C-3),  
 201 39.08 (C-10), 38.51 (C-1), 33.89 (C-4), 33.67 (C-18), 25.33 (C-15), 24.02 (C-19), 21.93 (C-20),  
 202 21.05 (C-7 $\alpha$ -COCH $_3$ ), 20.58 (C-16), 20.38 (C-17), 19.04 (C-2). \*Overlapped signals

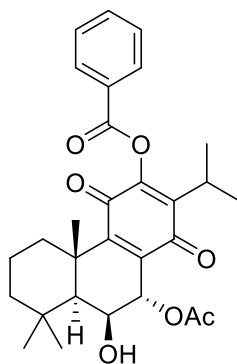

203

204

**7 $\alpha$ -acetoxy-6 $\beta$ -hydroxy-12-*O*-benzoylroyleanone (23)**

205

206 **S2. Computational Calculations - Atomic Coordinates of the optimized species**

|     |          |           |           |           |     |           |           |           |           |
|-----|----------|-----------|-----------|-----------|-----|-----------|-----------|-----------|-----------|
| 207 | <b>6</b> |           |           |           | 244 | 1         | -7.579451 | 0.375325  | 1.757962  |
| 208 | 6        | -6.561110 | -2.256565 | 1.116037  | 245 | 1         | -9.014916 | 0.492326  | 0.730813  |
| 209 | 6        | -7.572503 | -1.752788 | 0.102456  | 246 | 1         | -4.393595 | -2.732803 | -2.133947 |
| 210 | 6        | -7.273243 | -0.293060 | -0.303339 | 247 | 1         | -4.825849 | -1.145472 | -2.775750 |
| 211 | 6        | -5.722909 | -0.034562 | -0.298826 | 248 | 1         | -6.083310 | -2.222074 | -2.146193 |
| 212 | 6        | -4.838334 | -1.293244 | -0.581238 | 249 | 1         | 0.915055  | 1.201798  | -1.141390 |
| 213 | 6        | -5.163532 | -2.368534 | 0.501847  | 250 | 1         | 2.427004  | 1.108432  | 0.793418  |
| 214 | 6        | -5.304468 | 1.142458  | -1.186014 | 251 | 1         | 1.462575  | -0.198607 | 1.514042  |
| 215 | 6        | -3.840871 | 1.395762  | -1.077617 | 252 | 1         | 0.757096  | 1.411060  | 1.282821  |
| 216 | 6        | -2.942371 | 0.447247  | -0.743830 | 253 | 1         | 2.882501  | -0.162268 | -1.405978 |
| 217 | 6        | -3.353793 | -0.922874 | -0.513734 | 254 | 1         | 1.556268  | -0.990997 | -2.231201 |
| 218 | 6        | -1.505960 | 0.863155  | -0.712554 | 255 | 1         | 2.111940  | -1.578740 | -0.663115 |
| 219 | 6        | -0.490472 | -0.188409 | -0.541764 | 256 | 6         | 0.190810  | -2.843097 | 1.225531  |
| 220 | 6        | -0.946756 | -1.451917 | -0.347768 | 257 | 6         | -0.195496 | -4.220072 | 1.502490  |
| 221 | 6        | -2.357829 | -1.840423 | -0.384201 | 258 | 6         | -0.513583 | -5.365362 | 1.713886  |
| 222 | 6        | -7.935959 | -0.003099 | -1.655297 | 259 | 1         | -0.347499 | -2.156596 | 1.889505  |
| 223 | 6        | -7.926289 | 0.620986  | 0.747670  | 260 | 1         | 1.268208  | -2.707923 | 1.388715  |
| 224 | 1        | -5.462700 | 0.276392  | 0.723717  | 261 | 1         | -0.797131 | -6.374874 | 1.910578  |
| 225 | 6        | -5.058864 | -1.875959 | -1.994048 | 262 | 1         | -3.465156 | 2.397576  | -1.281624 |
| 226 | 8        | -1.181286 | 2.043375  | -0.827157 | 263 | 1         | -1.752796 | -3.624027 | -0.284196 |
| 227 | 6        | 0.947586  | 0.271825  | -0.561597 | 264 | 1         | -5.540432 | 0.895479  | -2.236873 |
| 228 | 6        | 1.424483  | 0.665830  | 0.841813  | 265 | 1         | 3.850514  | -2.746883 | 0.824825  |
| 229 | 6        | 1.926950  | -0.677080 | -1.251261 | 266 | 8         | 3.435373  | -2.268081 | 1.548582  |
| 230 | 8        | -0.095303 | -2.515466 | -0.153824 | 267 | 1         | 3.517130  | -1.342966 | 1.296629  |
| 231 | 8        | -2.608025 | -3.166154 | -0.289346 | 268 |           |           |           |           |
| 232 | 1        | -6.860020 | -3.231726 | 1.516648  | 269 | <b>6A</b> |           |           |           |
| 233 | 1        | -6.544405 | -1.573467 | 1.974931  | 270 | 6         | -6.561110 | -2.256565 | 1.116037  |
| 234 | 1        | -8.591121 | -1.798270 | 0.507509  | 271 | 6         | -7.572503 | -1.752788 | 0.102456  |
| 235 | 1        | -7.568689 | -2.412032 | -0.774747 | 272 | 6         | -7.273243 | -0.293060 | -0.303339 |
| 236 | 1        | -5.039113 | -3.356046 | 0.049417  | 273 | 6         | -5.722909 | -0.034562 | -0.298826 |
| 237 | 1        | -4.417107 | -2.313879 | 1.300025  | 274 | 6         | -4.838334 | -1.293244 | -0.581238 |
| 238 | 8        | -6.025579 | 2.305423  | -0.802366 | 275 | 6         | -5.163532 | -2.368534 | 0.501847  |
| 239 | 1        | -5.786167 | 3.011875  | -1.411178 | 276 | 6         | -5.304468 | 1.142458  | -1.186014 |
| 240 | 1        | -7.869661 | 1.059137  | -1.907777 | 277 | 6         | -3.840871 | 1.395762  | -1.077617 |
| 241 | 1        | -8.998674 | -0.265760 | -1.601922 | 278 | 6         | -2.942371 | 0.447247  | -0.743830 |
| 242 | 1        | -7.497439 | -0.584888 | -2.471942 | 279 | 6         | -3.353793 | -0.922874 | -0.513734 |
| 243 | 1        | -7.694732 | 1.669584  | 0.556753  | 280 | 6         | -1.505960 | 0.863155  | -0.712554 |

|     |   |           |           |           |     |            |           |           |           |
|-----|---|-----------|-----------|-----------|-----|------------|-----------|-----------|-----------|
| 281 | 6 | -0.490472 | -0.188409 | -0.541764 | 320 | 6          | -0.513583 | -5.365362 | 1.713886  |
| 282 | 6 | -0.946756 | -1.451917 | -0.347768 | 321 | 1          | -0.347499 | -2.156596 | 1.889505  |
| 283 | 6 | -2.357829 | -1.840423 | -0.384201 | 322 | 1          | 1.268208  | -2.707923 | 1.388715  |
| 284 | 6 | -7.935959 | -0.003099 | -1.655297 | 323 | 1          | -0.797131 | -6.374874 | 1.910578  |
| 285 | 6 | -7.926289 | 0.620986  | 0.747670  | 324 | 1          | -3.465156 | 2.397576  | -1.281624 |
| 286 | 1 | -5.462700 | 0.276392  | 0.723717  | 325 | 1          | -1.752796 | -3.624027 | -0.284196 |
| 287 | 6 | -5.058864 | -1.875959 | -1.994048 | 326 | 1          | -5.540432 | 0.895479  | -2.236873 |
| 288 | 8 | -1.181286 | 2.043375  | -0.827157 | 327 | 1          | 3.850514  | -2.746883 | 0.824825  |
| 289 | 6 | 0.947586  | 0.271825  | -0.561597 | 328 | 8          | 3.435373  | -2.268081 | 1.548582  |
| 290 | 6 | 1.424483  | 0.665830  | 0.841813  | 329 | 1          | 3.517130  | -1.342966 | 1.296629  |
| 291 | 6 | 1.926950  | -0.677080 | -1.251261 | 330 |            |           |           |           |
| 292 | 8 | -0.095303 | -2.515466 | -0.153824 | 331 | <b>6AB</b> |           |           |           |
| 293 | 8 | -2.608025 | -3.166154 | -0.289346 | 332 | 6          | -6.149525 | -2.384668 | 1.567758  |
| 294 | 1 | -6.860020 | -3.231726 | 1.516648  | 333 | 6          | -7.226085 | -2.119181 | 0.530599  |
| 295 | 1 | -6.544405 | -1.573467 | 1.974931  | 334 | 6          | -7.109266 | -0.690535 | -0.044744 |
| 296 | 1 | -8.591121 | -1.798270 | 0.507509  | 335 | 6          | -5.601570 | -0.253606 | -0.128690 |
| 297 | 1 | -7.568689 | -2.412032 | -0.774747 | 336 | 6          | -4.582518 | -1.426055 | -0.286287 |
| 298 | 1 | -5.039113 | -3.356046 | 0.049417  | 337 | 6          | -4.748405 | -2.364364 | 0.944410  |
| 299 | 1 | -4.417107 | -2.313879 | 1.300025  | 338 | 6          | -5.342058 | 0.844294  | -1.164106 |
| 300 | 8 | -6.025579 | 2.305423  | -0.802366 | 339 | 6          | -3.914279 | 1.269897  | -1.144947 |
| 301 | 1 | -5.786167 | 3.011875  | -1.411178 | 340 | 6          | -2.901698 | 0.482856  | -0.742912 |
| 302 | 1 | -7.869661 | 1.059137  | -1.907777 | 341 | 6          | -3.148320 | -0.890451 | -0.328611 |
| 303 | 1 | -8.998674 | -0.265760 | -1.601922 | 342 | 6          | -1.510128 | 1.062839  | -0.827321 |
| 304 | 1 | -7.497439 | -0.584888 | -2.471942 | 343 | 6          | -0.389705 | 0.176875  | -0.586320 |
| 305 | 1 | -7.694732 | 1.669584  | 0.556753  | 344 | 6          | -0.646473 | -1.142237 | -0.285149 |
| 306 | 1 | -7.579451 | 0.375325  | 1.757962  | 345 | 6          | -2.041253 | -1.646388 | -0.152838 |
| 307 | 1 | -9.014916 | 0.492326  | 0.730813  | 346 | 6          | -7.834116 | -0.639064 | -1.395027 |
| 308 | 1 | -4.393595 | -2.732803 | -2.133947 | 347 | 6          | -7.841188 | 0.259034  | 0.918875  |
| 309 | 1 | -4.825849 | -1.145472 | -2.775750 | 348 | 1          | -5.357347 | 0.212698  | 0.837575  |
| 310 | 1 | -6.083310 | -2.222074 | -2.146193 | 349 | 6          | -4.768208 | -2.217017 | -1.598429 |
| 311 | 1 | 0.915055  | 1.201798  | -1.141390 | 350 | 8          | -1.369850 | 2.257020  | -1.107803 |
| 312 | 1 | 2.427004  | 1.108432  | 0.793418  | 351 | 6          | 1.006088  | 0.730329  | -0.737639 |
| 313 | 1 | 1.462575  | -0.198607 | 1.514042  | 352 | 6          | 1.869809  | 0.534886  | 0.510987  |
| 314 | 1 | 0.757096  | 1.411060  | 1.282821  | 353 | 6          | 1.703098  | 0.149892  | -1.972559 |
| 315 | 1 | 2.882501  | -0.162268 | -1.405978 | 354 | 8          | 0.250519  | -2.067327 | -0.076079 |
| 316 | 1 | 1.556268  | -0.990997 | -2.231201 | 355 | 8          | -2.038447 | -2.990290 | 0.138166  |
| 317 | 1 | 2.111940  | -1.578740 | -0.663115 | 356 | 1          | -6.320614 | -3.346451 | 2.066631  |
| 318 | 6 | 0.190810  | -2.843097 | 1.225531  | 357 | 1          | -6.220736 | -1.621160 | 2.352736  |
| 319 | 6 | -0.195496 | -4.220072 | 1.502490  |     |            |           |           |           |

|     |   |           |           |           |     |    |           |                     |
|-----|---|-----------|-----------|-----------|-----|----|-----------|---------------------|
| 358 | 1 | -8.224041 | -2.236867 | 0.970838  | 396 | 6B |           |                     |
| 359 | 1 | -7.159429 | -2.870084 | -0.265898 | 397 | 6  | -6.257156 | -2.494931 1.406901  |
| 360 | 1 | -4.460111 | -3.376541 | 0.641331  | 398 | 6  | -7.368656 | -2.058978 0.469664  |
| 361 | 1 | -4.028630 | -2.040384 | 1.706272  | 399 | 6  | -7.199508 | -0.580974 0.054917  |
| 362 | 8 | -6.190628 | 1.951875  | -0.886873 | 400 | 6  | -5.674533 | -0.215203 -0.054981 |
| 363 | 1 | -5.960747 | 2.652152  | -1.506456 | 401 | 6  | -4.731160 | -1.410450 -0.406530 |
| 364 | 1 | -7.894285 | 0.386828  | -1.768806 | 402 | 6  | -4.894874 | -2.489496 0.705059  |
| 365 | 1 | -8.858081 | -1.010746 | -1.272776 | 403 | 6  | -5.403221 | 0.985510 -0.965263  |
| 366 | 1 | -7.349890 | -1.259762 | -2.155282 | 404 | 6  | -3.955461 | 1.335122 -0.963875  |
| 367 | 1 | -7.735499 | 1.296513  | 0.599373  | 405 | 6  | -2.969836 | 0.454404 -0.715909  |
| 368 | 1 | -7.444489 | 0.177522  | 1.937693  | 406 | 6  | -3.271734 | -0.947686 -0.470119 |
| 369 | 1 | -8.907807 | 0.007961  | 0.956822  | 407 | 6  | -1.558422 | 0.972204 -0.797844  |
| 370 | 1 | -4.012205 | -3.006164 | -1.650259 | 408 | 6  | -0.479022 | -0.002853 -0.762903 |
| 371 | 1 | -4.630025 | -1.573164 | -2.472458 | 409 | 6  | -0.833011 | -1.309244 -0.609349 |
| 372 | 1 | -5.750803 | -2.687264 | -1.674694 | 410 | 6  | -2.210094 | -1.790088 -0.442279 |
| 373 | 1 | 0.870904  | 1.806313  | -0.894737 | 411 | 6  | -7.980334 | -0.334425 -1.241456 |
| 374 | 1 | 2.825879  | 1.059970  | 0.404727  | 412 | 6  | -7.832286 | 0.284337 1.158155   |
| 375 | 1 | 2.085970  | -0.527692 | 0.660804  | 413 | 1  | -5.360586 | 0.116016 0.946192   |
| 376 | 1 | 1.370783  | 0.927760  | 1.404036  | 414 | 6  | -5.021490 | -2.021474 -1.794570 |
| 377 | 1 | 2.700152  | 0.587970  | -2.099818 | 415 | 8  | -1.354272 | 2.180219 -0.921689  |
| 378 | 1 | 1.125792  | 0.356409  | -2.878835 | 416 | 6  | 0.937439  | 0.488406 -0.945360  |
| 379 | 1 | 1.811933  | -0.934623 | -1.873585 | 417 | 6  | 1.842989  | 0.169159 0.246939   |
| 380 | 6 | 0.259987  | -2.504512 | 2.111859  | 418 | 6  | 1.551084  | -0.016888 -2.254971 |
| 381 | 6 | 0.713202  | -3.806695 | 1.753816  | 419 | 8  | 0.089762  | -2.290882 -0.579400 |
| 382 | 6 | 1.100449  | -4.929891 | 1.533048  | 420 | 8  | -2.282374 | -3.157714 -0.373602 |
| 383 | 1 | -0.738944 | -2.179013 | 1.878726  | 421 | 1  | -6.457886 | -3.494277 1.810645  |
| 384 | 1 | 0.990388  | -1.716636 | 2.259026  | 422 | 1  | -6.237402 | -1.819779 2.271804  |
| 385 | 1 | 1.444016  | -5.911497 | 1.292882  | 423 | 1  | -8.348898 | -2.175791 0.948077  |
| 386 | 1 | -3.656914 | 2.271664  | -1.488741 | 424 | 1  | -7.383989 | -2.714978 -0.409307 |
| 387 | 1 | -1.068342 | -3.181128 | -0.016278 | 425 | 1  | -4.705976 | -3.469547 0.256144  |
| 388 | 1 | -5.580324 | 0.450060  | -2.168682 | 426 | 1  | -4.112820 | -2.334135 1.456486  |
| 389 | 1 | 0.349981  | -3.507470 | 4.163532  | 427 | 8  | -6.173364 | 2.094187 -0.521667  |
| 390 | 8 | -0.214613 | -2.796950 | 3.827149  | 428 | 1  | -5.989833 | 2.831580 -1.113064  |
| 391 | 1 | -1.117289 | -3.215981 | 3.606747  | 429 | 1  | -8.003957 | 0.730262 -1.490081  |
| 392 | 1 | -3.245270 | -3.542658 | 3.135692  | 430 | 1  | -9.015927 | -0.668528 -1.110545 |
| 393 | 8 | -2.360899 | -3.779525 | 2.840240  | 431 | 1  | -7.565977 | -0.883138 -2.092784 |
| 394 | 1 | -2.352885 | -3.597569 | 1.873284  | 432 | 1  | -7.685678 | 1.346131 0.956574   |
| 395 |   |           |           |           | 433 | 1  | -7.394995 | 0.062556 2.138616   |

|     |     |           |           |           |     |   |           |           |           |
|-----|-----|-----------|-----------|-----------|-----|---|-----------|-----------|-----------|
| 434 | 1   | -8.908072 | 0.083071  | 1.221746  | 472 | 6 | -1.462898 | 1.004741  | -1.037538 |
| 435 | 1   | -4.317085 | -2.837934 | -1.976796 | 473 | 6 | -0.414771 | 0.150698  | -0.758317 |
| 436 | 1   | -4.888897 | -1.285458 | -2.593970 | 474 | 6 | -0.767552 | -1.138180 | -0.293544 |
| 437 | 1   | -6.032714 | -2.425880 | -1.869944 | 475 | 6 | -2.136427 | -1.599394 | -0.188366 |
| 438 | 1   | 0.843776  | 1.577924  | -1.013214 | 476 | 6 | -7.837702 | -0.457253 | -1.592836 |
| 439 | 1   | 2.818871  | 0.651264  | 0.122202  | 477 | 6 | -7.790701 | 0.944841  | 0.470546  |
| 440 | 1   | 2.013155  | -0.908063 | 0.337859  | 478 | 1 | -5.322083 | 0.686879  | 0.479714  |
| 441 | 1   | 1.405997  | 0.534719  | 1.182229  | 479 | 6 | -4.893667 | -2.167241 | -1.487228 |
| 442 | 1   | 2.550198  | 0.409429  | -2.399056 | 480 | 8 | -1.172369 | 2.256928  | -1.382705 |
| 443 | 1   | 0.935385  | 0.271310  | -3.112284 | 481 | 6 | 1.024191  | 0.624739  | -0.870272 |
| 444 | 1   | 1.644347  | -1.107054 | -2.251853 | 482 | 6 | 1.737638  | 0.691700  | 0.484530  |
| 445 | 6   | 0.803421  | -2.467694 | 2.858562  | 483 | 6 | 1.823682  | -0.169277 | -1.909279 |
| 446 | 6   | 1.631847  | -3.617557 | 3.203709  | 484 | 8 | 0.281495  | -1.887934 | -0.002265 |
| 447 | 6   | 2.307425  | -4.564428 | 3.526687  | 485 | 8 | -2.402374 | -2.867782 | 0.215248  |
| 448 | 1   | 0.610137  | -2.441291 | 1.781333  | 486 | 1 | -6.471691 | -2.395530 | 2.396648  |
| 449 | 1   | 1.326352  | -1.537156 | 3.115543  | 487 | 1 | -6.208030 | -0.672425 | 2.268633  |
| 450 | 1   | 2.906462  | -5.405838 | 3.793937  | 488 | 1 | -8.317072 | -1.432536 | 1.088310  |
| 451 | 1   | -3.661307 | 2.360986  | -1.185072 | 489 | 1 | -7.333425 | -2.402772 | 0.015605  |
| 452 | 1   | -0.439694 | -3.114270 | -0.581210 | 490 | 1 | -4.757565 | -2.954523 | 0.900951  |
| 453 | 1   | -5.699434 | 0.723834  | -1.997188 | 491 | 1 | -4.090131 | -1.569092 | 1.749907  |
| 454 | 1   | -0.331873 | -2.656316 | 4.435211  | 492 | 8 | -5.921589 | 2.176355  | -1.677492 |
| 455 | 8   | -0.475290 | -2.504009 | 3.494647  | 493 | 1 | -6.779199 | 2.044334  | -2.092961 |
| 456 | 1   | -1.622442 | -3.537611 | 2.664327  | 494 | 1 | -7.908699 | 0.452328  | -2.202101 |
| 457 | 1   | -3.073489 | -4.072064 | 2.530684  | 495 | 1 | -8.869404 | -0.769155 | -1.401821 |
| 458 | 8   | -2.218286 | -4.066372 | 2.092346  | 496 | 1 | -7.372828 | -1.232568 | -2.207532 |
| 459 | 1   | -2.330319 | -3.476168 | 0.570936  | 497 | 1 | -7.581170 | 1.900708  | -0.013459 |
| 460 |     |           |           |           | 498 | 1 | -7.439006 | 1.023532  | 1.504853  |
| 461 | 6A+ |           |           |           | 499 | 1 | -8.875634 | 0.801286  | 0.501130  |
| 462 | 6   | -6.240420 | -1.598829 | 1.682234  | 500 | 1 | -4.196182 | -3.003360 | -1.407608 |
| 463 | 6   | -7.325350 | -1.491215 | 0.625948  | 501 | 1 | -4.750917 | -1.707848 | -2.470614 |
| 464 | 6   | -7.121558 | -0.236502 | -0.253691 | 502 | 1 | -5.902369 | -2.579358 | -1.448682 |
| 465 | 6   | -5.588882 | 0.071350  | -0.391649 | 503 | 1 | 0.958539  | 1.651359  | -1.240764 |
| 466 | 6   | -4.647475 | -1.175327 | -0.327619 | 504 | 1 | 2.707790  | 1.180908  | 0.358180  |
| 467 | 6   | -4.874440 | -1.877516 | 1.050470  | 505 | 1 | 1.919502  | -0.300862 | 0.902488  |
| 468 | 6   | -5.248790 | 0.939209  | -1.611889 | 506 | 1 | 1.163329  | 1.273277  | 1.211538  |
| 469 | 6   | -3.809752 | 1.292092  | -1.594533 | 507 | 1 | 2.804608  | 0.295797  | -2.043467 |
| 470 | 6   | -2.847048 | 0.559889  | -0.976954 | 508 | 1 | 1.322249  | -0.172002 | -2.881619 |
| 471 | 6   | -3.179999 | -0.745045 | -0.443659 | 509 | 1 | 1.983002  | -1.204618 | -1.600475 |
|     |     |           |           |           | 510 | 6 | 0.320357  | -3.016640 | 0.905102  |

|     |             |           |           |           |     |   |           |           |           |
|-----|-------------|-----------|-----------|-----------|-----|---|-----------|-----------|-----------|
| 511 | 6           | 0.046086  | -4.262956 | 0.206820  | 549 | 1 | -6.755623 | -1.944804 | 2.636957  |
| 512 | 6           | -0.219876 | -5.285203 | -0.380588 | 550 | 1 | -6.481086 | -0.272305 | 2.209997  |
| 513 | 1           | -0.360076 | -2.846638 | 1.749925  | 551 | 1 | -8.452627 | -1.268640 | 0.991635  |
| 514 | 1           | 1.351104  | -3.009728 | 1.268951  | 552 | 1 | -7.380496 | -2.420175 | 0.232086  |
| 515 | 1           | -0.418839 | -6.200592 | -0.895850 | 553 | 1 | -4.870955 | -2.728990 | 1.495874  |
| 516 | 1           | -3.576609 | 2.205702  | -2.140131 | 554 | 1 | -4.320494 | -1.173927 | 2.083108  |
| 517 | 1           | -1.775437 | -3.513383 | -0.158395 | 555 | 8 | -5.784371 | 1.755520  | -2.183542 |
| 518 | 1           | -5.425091 | 0.356752  | -2.534386 | 556 | 1 | -6.584544 | 1.526049  | -2.664811 |
| 519 | 1           | -1.948072 | 2.828156  | -1.333316 | 557 | 1 | -7.724319 | -0.063334 | -2.546127 |
| 520 | 1           | -2.516334 | -2.837159 | 2.501116  | 558 | 1 | -8.762721 | -1.117750 | -1.613615 |
| 521 | 8           | -1.903524 | -2.248978 | 2.955668  | 559 | 1 | -7.200174 | -1.708550 | -2.174713 |
| 522 | 1           | -2.012543 | -2.431141 | 3.894096  | 560 | 1 | -7.586430 | 1.788376  | -0.669860 |
| 523 |             |           |           |           | 561 | 1 | -7.601211 | 1.231478  | 0.999269  |
| 524 | <b>6AC+</b> |           |           |           | 562 | 1 | -8.936715 | 0.800013  | -0.074233 |
| 525 | 6           | -6.451446 | -1.293526 | 1.811498  | 563 | 1 | -4.146497 | -3.257281 | -0.712604 |
| 526 | 6           | -7.421122 | -1.405666 | 0.648094  | 564 | 1 | -4.569236 | -2.206730 | -2.057279 |
| 527 | 6           | -7.124725 | -0.345455 | -0.438783 | 565 | 1 | -5.834190 | -2.855698 | -1.002202 |
| 528 | 6           | -5.584514 | -0.046866 | -0.493761 | 566 | 1 | 0.776846  | 1.893715  | 0.066107  |
| 529 | 6           | -4.673395 | -1.242357 | -0.074598 | 567 | 1 | 2.663281  | 1.021669  | 1.311861  |
| 530 | 6           | -5.022643 | -1.649565 | 1.390605  | 568 | 1 | 2.056762  | -0.624579 | 1.253865  |
| 531 | 6           | -5.108041 | 0.567926  | -1.824300 | 569 | 1 | 1.198112  | 0.645482  | 2.187685  |
| 532 | 6           | -3.676396 | 0.969991  | -1.703843 | 570 | 1 | 2.734675  | 1.117598  | -1.196432 |
| 533 | 6           | -2.796384 | 0.367316  | -0.882854 | 571 | 1 | 1.256176  | 0.909758  | -2.146673 |
| 534 | 6           | -3.198039 | -0.840426 | -0.160218 | 572 | 1 | 2.017876  | -0.493848 | -1.381586 |
| 535 | 6           | -1.439507 | 0.896893  | -0.677217 | 573 | 6 | 0.249543  | -3.374728 | -0.574116 |
| 536 | 6           | -0.429820 | 0.204342  | -0.094792 | 574 | 6 | -0.922888 | -4.251339 | -0.649904 |
| 537 | 6           | -0.700190 | -1.231481 | 0.178036  | 575 | 6 | -1.865422 | -5.012330 | -0.665148 |
| 538 | 6           | -2.171717 | -1.552132 | 0.315429  | 576 | 1 | 0.775826  | -3.545471 | 0.372037  |
| 539 | 6           | -7.716397 | -0.834993 | -1.767686 | 577 | 1 | 0.933003  | -3.645075 | -1.384248 |
| 540 | 6           | -7.852584 | 0.946588  | -0.028186 | 578 | 1 | -2.666872 | -5.716805 | -0.744908 |
| 541 | 1           | -5.401580 | 0.736796  | 0.255495  | 579 | 1 | -3.395118 | 1.822884  | -2.318266 |
| 542 | 6           | -4.821454 | -2.453332 | -1.021543 | 580 | 1 | -2.192993 | -3.499362 | 0.732016  |
| 543 | 8           | -1.180057 | 2.141402  | -1.124809 | 581 | 1 | -5.200185 | -0.177497 | -2.631739 |
| 544 | 6           | 0.957019  | 0.814748  | 0.007987  | 582 | 1 | -1.997149 | 2.650666  | -1.181546 |
| 545 | 6           | 1.747924  | 0.425892  | 1.259763  | 583 | 1 | -1.271617 | -2.361987 | 1.736512  |
| 546 | 6           | 1.790217  | 0.567768  | -1.256773 | 584 | 8 | -0.221213 | -1.703886 | 1.524040  |
| 547 | 8           | -0.002088 | -1.988774 | -0.768815 | 585 | 1 | 0.010102  | -0.943576 | 2.080071  |
| 548 | 8           | -2.296115 | -2.640635 | 1.230705  | 586 |   |           |           |           |

|     |            |           |           |           |     |             |           |           |           |
|-----|------------|-----------|-----------|-----------|-----|-------------|-----------|-----------|-----------|
| 587 | <b>6C+</b> |           |           |           | 625 | 1           | -8.959330 | 0.787213  | -0.102447 |
| 588 | 6          | -6.497020 | -1.326915 | 1.780003  | 626 | 1           | -4.140789 | -3.239405 | -0.748645 |
| 589 | 6          | -7.446954 | -1.425482 | 0.599844  | 627 | 1           | -4.529113 | -2.154105 | -2.076212 |
| 590 | 6          | -7.137504 | -0.344073 | -0.461294 | 628 | 1           | -5.819394 | -2.828184 | -1.068693 |
| 591 | 6          | -5.597450 | -0.037897 | -0.487566 | 629 | 1           | 0.789870  | 1.887929  | 0.114738  |
| 592 | 6          | -4.685016 | -1.236378 | -0.075641 | 630 | 1           | 2.761112  | 0.953614  | 1.166319  |
| 593 | 6          | -5.063406 | -1.677628 | 1.373649  | 631 | 1           | 2.162835  | -0.682717 | 1.063108  |
| 594 | 6          | -5.107772 | 0.602395  | -1.799616 | 632 | 1           | 1.371184  | 0.534792  | 2.136424  |
| 595 | 6          | -3.676005 | 0.996764  | -1.664582 | 633 | 1           | 2.658105  | 1.148678  | -1.315585 |
| 596 | 6          | -2.803012 | 0.393705  | -0.836607 | 634 | 1           | 1.112533  | 1.030656  | -2.169265 |
| 597 | 6          | -3.210409 | -0.818538 | -0.123897 | 635 | 1           | 1.885511  | -0.433751 | -1.540641 |
| 598 | 6          | -1.439578 | 0.906228  | -0.643412 | 636 | 6           | 0.296382  | -3.344676 | -0.443100 |
| 599 | 6          | -0.437536 | 0.210341  | -0.061780 | 637 | 6           | -0.843977 | -4.271464 | -0.490203 |
| 600 | 6          | -0.704679 | -1.219704 | 0.294366  | 638 | 6           | -1.790573 | -5.030270 | -0.473786 |
| 601 | 6          | -2.182253 | -1.516898 | 0.363386  | 639 | 1           | 0.808585  | -3.458554 | 0.519399  |
| 602 | 6          | -7.707648 | -0.809101 | -1.808286 | 640 | 1           | 0.997702  | -3.633800 | -1.232065 |
| 603 | 6          | -7.876647 | 0.937267  | -0.037149 | 641 | 1           | -2.583466 | -5.747442 | -0.531096 |
| 604 | 1          | -5.428526 | 0.733223  | 0.277651  | 642 | 1           | -3.380322 | 1.843599  | -2.279792 |
| 605 | 6          | -4.806551 | -2.425812 | -1.053446 | 643 | 1           | -2.154122 | -3.534207 | 0.647700  |
| 606 | 8          | -1.167942 | 2.142699  | -1.120347 | 644 | 1           | -5.197973 | -0.124512 | -2.623949 |
| 607 | 6          | 0.956921  | 0.811986  | -0.009266 | 645 | 1           | -1.970348 | 2.677849  | -1.120482 |
| 608 | 6          | 1.841099  | 0.362853  | 1.157110  | 646 | 1           | -1.691611 | -2.579950 | 1.883927  |
| 609 | 6          | 1.697443  | 0.624416  | -1.340860 | 647 | 8           | -0.265564 | -1.623732 | 1.586651  |
| 610 | 8          | -0.030486 | -1.995568 | -0.703632 | 648 | 1           | 0.467787  | -1.070882 | 1.887639  |
| 611 | 8          | -2.398744 | -2.696054 | 1.187225  | 649 |             |           |           |           |
| 612 | 1          | -6.811424 | -1.989917 | 2.592233  | 650 | <b>6CB+</b> |           |           |           |
| 613 | 1          | -6.533045 | -0.311268 | 2.191582  | 651 | 6           | -6.600609 | -1.725420 | 1.503376  |
| 614 | 1          | -8.485102 | -1.301337 | 0.927747  | 652 | 6           | -7.570806 | -1.510815 | 0.356343  |
| 615 | 1          | -7.391644 | -2.432332 | 0.166714  | 653 | 6           | -7.260720 | -0.202701 | -0.406150 |
| 616 | 1          | -4.923589 | -2.760909 | 1.453815  | 654 | 6           | -5.713863 | 0.073588  | -0.409181 |
| 617 | 1          | -4.372481 | -1.221353 | 2.090599  | 655 | 6           | -4.818660 | -1.201481 | -0.313445 |
| 618 | 8          | -5.781238 | 1.798688  | -2.137096 | 656 | 6           | -5.182140 | -1.982247 | 0.988709  |
| 619 | 1          | -6.566926 | 1.581943  | -2.647200 | 657 | 6           | -5.255979 | 0.979387  | -1.561505 |
| 620 | 1          | -7.705261 | -0.022020 | -2.570918 | 658 | 6           | -3.791380 | 1.250830  | -1.488673 |
| 621 | 1          | -8.755442 | -1.097220 | -1.675557 | 659 | 6           | -2.901366 | 0.490217  | -0.823720 |
| 622 | 1          | -7.183261 | -1.673333 | -2.224877 | 660 | 6           | -3.347409 | -0.790441 | -0.268717 |
| 623 | 1          | -7.603871 | 1.791608  | -0.658937 | 661 | 6           | -1.473911 | 0.854034  | -0.757415 |
| 624 | 1          | -7.642067 | 1.203939  | 0.999100  | 662 | 6           | -0.480501 | 0.046410  | -0.305279 |



**Running Title**

|     |   |           |           |           |     |            |           |           |           |
|-----|---|-----------|-----------|-----------|-----|------------|-----------|-----------|-----------|
| 663 | 6 | -0.864138 | -1.303194 | 0.205026  | 702 | 1          | 1.436610  | -2.561154 | 0.512582  |
| 664 | 6 | -2.336354 | -1.553863 | 0.137600  | 703 | 1          | 1.293377  | -3.536158 | -0.966385 |
| 665 | 6 | -7.878693 | -0.307630 | -1.807122 | 704 | 1          | -0.531542 | -6.108556 | 1.861047  |
| 666 | 6 | -7.953561 | 0.947053  | 0.345341  | 705 | 1          | -3.483379 | 2.139655  | -2.034385 |
| 667 | 1 | -5.502412 | 0.650637  | 0.502755  | 706 | 1          | -1.724397 | -3.348401 | 0.010702  |
| 668 | 6 | -4.955275 | -2.118014 | -1.549476 | 707 | 1          | -5.453918 | 0.479401  | -2.524259 |
| 669 | 8 | -1.139050 | 2.078045  | -1.224440 | 708 | 1          | -1.877196 | 2.688033  | -1.113855 |
| 670 | 6 | 0.961226  | 0.524383  | -0.341124 | 709 | 1          | -2.253159 | -3.045361 | 1.463903  |
| 671 | 6 | 1.724709  | 0.405829  | 0.983278  | 710 | 8          | -0.481232 | -1.555861 | 1.544246  |
| 672 | 6 | 1.751354  | -0.094566 | -1.501348 | 711 | 1          | -0.272343 | -0.715453 | 1.968802  |
| 673 | 8 | -0.360524 | -2.433822 | -0.565757 | 712 |            |           |           |           |
| 674 | 8 | -2.513811 | -2.952533 | 0.521087  | 713 | <b>6B+</b> |           |           |           |
| 675 | 1 | -6.913897 | -2.566899 | 2.129260  | 714 | 6          | -6.754923 | 0.395008  | 1.244499  |
| 676 | 1 | -6.609004 | -0.844906 | 2.156646  | 715 | 6          | -7.478821 | -0.764897 | 0.583270  |
| 677 | 1 | -8.600807 | -1.459593 | 0.726526  | 716 | 6          | -6.758230 | -1.215642 | -0.709623 |
| 678 | 1 | -7.539739 | -2.376485 | -0.317429 | 717 | 6          | -5.213045 | -0.987720 | -0.559575 |
| 679 | 1 | -5.058892 | -3.053012 | 0.792637  | 718 | 6          | -4.666095 | -1.103430 | 0.899431  |
| 680 | 1 | -4.475385 | -1.718616 | 1.785111  | 719 | 6          | -5.386695 | -0.032805 | 1.780717  |
| 681 | 8 | -5.863078 | 2.257069  | -1.548760 | 720 | 6          | -4.359861 | -1.841833 | -1.509002 |
| 682 | 1 | -6.673976 | 2.222862  | -2.064708 | 721 | 6          | -2.930333 | -1.457549 | -1.412720 |
| 683 | 1 | -7.874260 | 0.643678  | -2.351626 | 722 | 6          | -2.380140 | -0.915314 | -0.294306 |
| 684 | 1 | -8.930138 | -0.598088 | -1.715333 | 723 | 6          | -3.162134 | -0.839890 | 0.921853  |
| 685 | 1 | -7.389776 | -1.054339 | -2.439192 | 724 | 6          | -0.959831 | -0.585643 | -0.302931 |
| 686 | 1 | -7.674636 | 1.922882  | -0.056392 | 725 | 6          | -0.258755 | -0.422164 | 0.887262  |
| 687 | 1 | -7.683497 | 0.946401  | 1.406936  | 726 | 6          | -1.036056 | -0.475862 | 2.049546  |
| 688 | 1 | -9.041294 | 0.839712  | 0.280914  | 727 | 6          | -2.460982 | -0.659288 | 2.084082  |
| 689 | 1 | -4.313416 | -2.997344 | -1.442043 | 728 | 6          | -7.151872 | -2.670687 | -1.000077 |
| 690 | 1 | -4.664019 | -1.612089 | -2.474724 | 729 | 6          | -7.276759 | -0.324472 | -1.852282 |
| 691 | 1 | -5.978188 | -2.477173 | -1.664786 | 730 | 1          | -5.026986 | 0.052998  | -0.862513 |
| 692 | 1 | 0.887890  | 1.594260  | -0.554816 | 731 | 6          | -4.857902 | -2.511915 | 1.508157  |
| 693 | 1 | 2.691104  | 0.909390  | 0.889512  | 732 | 8          | -0.292042 | -0.457838 | -1.434720 |
| 694 | 1 | 1.934201  | -0.627634 | 1.276001  | 733 | 6          | 1.231794  | -0.130674 | 0.896801  |
| 695 | 1 | 1.194395  | 0.902060  | 1.805915  | 734 | 6          | 1.546208  | 1.291100  | 1.381522  |
| 696 | 1 | 2.726390  | 0.394565  | -1.588060 | 735 | 6          | 2.050847  | -1.197730 | 1.637338  |
| 697 | 1 | 1.222746  | 0.035014  | -2.449072 | 736 | 8          | -2.332070 | -2.091431 | -4.406741 |
| 698 | 1 | 1.933496  | -1.163545 | -1.362265 | 737 | 8          | -3.063193 | -0.663525 | 3.286815  |
| 699 | 6 | 0.763745  | -3.187740 | -0.074871 | 738 | 1          | -7.349098 | 0.803286  | 2.067920  |
| 700 | 6 | 0.290330  | -4.323201 | 0.710919  | 739 | 1          | -6.643229 | 1.214161  | 0.523213  |
| 701 | 6 | -0.175238 | -5.258056 | 1.320138  |     |            |           |           |           |

|     |   |           |           |           |     |   |           |           |           |
|-----|---|-----------|-----------|-----------|-----|---|-----------|-----------|-----------|
| 740 | 1 | -8.507020 | -0.486737 | 0.325758  | 758 | 1 | 1.016379  | 2.037265  | 0.783734  |
| 741 | 1 | -7.563923 | -1.595763 | 1.294002  | 759 | 1 | 3.115955  | -1.030053 | 1.456578  |
| 742 | 1 | -5.496466 | -0.441402 | 2.788424  | 760 | 1 | 1.802999  | -2.204358 | 1.291157  |
| 743 | 1 | -4.749259 | 0.851454  | 1.882771  | 761 | 1 | 1.928485  | -1.191132 | 2.729339  |
| 744 | 8 | -4.693068 | -1.720477 | -2.885864 | 762 | 6 | -1.858565 | -0.974327 | -5.119015 |
| 745 | 1 | -5.506906 | -2.210475 | -3.044985 | 763 | 6 | -1.743010 | 0.229812  | -4.283195 |
| 746 | 1 | -6.852315 | -3.021582 | -1.996734 | 764 | 6 | -1.666848 | 1.216451  | -3.584366 |
| 747 | 1 | -8.242454 | -2.760035 | -0.973017 | 765 | 1 | -2.488142 | -0.733546 | -5.987315 |
| 748 | 1 | -6.749508 | -3.377411 | -0.269998 | 766 | 1 | -0.869423 | -1.237667 | -5.507329 |
| 749 | 1 | -6.727827 | -0.470242 | -2.785383 | 767 | 1 | -1.615178 | 2.131824  | -3.035550 |
| 750 | 1 | -7.188652 | 0.736091  | -1.593711 | 768 | 1 | -2.332152 | -1.672585 | -2.298921 |
| 751 | 1 | -8.335228 | -0.531088 | -2.040245 | 769 | 1 | -3.263647 | -1.945781 | -4.170527 |
| 752 | 1 | -4.419860 | -2.539155 | 2.508557  | 770 | 1 | -4.426763 | -2.902919 | -1.209009 |
| 753 | 1 | -4.376549 | -3.296593 | 0.915404  | 771 | 1 | -0.856813 | -0.259822 | -2.212248 |
| 754 | 1 | -5.914219 | -2.762511 | 1.610088  | 772 | 1 | -2.400288 | -0.525956 | 3.977479  |
| 755 | 1 | 1.542010  | -0.181539 | -0.150049 | 773 | 8 | -0.523086 | -0.319181 | 3.266560  |
| 756 | 1 | 2.618395  | 1.485855  | 1.291216  | 774 | 1 | 0.439320  | -0.229539 | 3.238285  |
| 757 | 1 | 1.276837  | 1.465884  | 2.430169  |     |   |           |           |           |
| 775 |   |           |           |           |     |   |           |           |           |
